# Supplementary material for: BiOCl/group-IV Xene bilayer heterojunctions: stability and electronic and photocatalytic properties
Source: Royal Society of Chemistry journal article supplement (doi:10.1039/d1cp00752a), 2021-01-01
Supplement: d1cp00752a1.pdf [file d1cp00752a1.pdf]

## Supporting Information

### **BiOCl/Group-IV Xene Bilayer Heterojunction: Stability and Electronic and Photocatalytic Properties**

*Jiating Lu,<sup>a,b</sup> Xi Zhang,<sup>a</sup> Leihao Feng,<sup>a</sup> Dan Gong,<sup>a</sup> Ya Nie,<sup>a</sup> and Gang Xiang<sup>\*a</sup>*

<sup>a</sup> College of Physics, Sichuan University, Chengdu, 610064, China.

<sup>b</sup> College of Physics and Electronic Information Engineering, Qinghai Normal University, Xining 810008, China.

In the supporting information, we first give the partial charge density of BiOCl/Xene bilayer HJs. Then, the PDOS diagrams and the band structures of BiOCl/Xene bilayer HJs under biaxial and uniaxial strain are given.

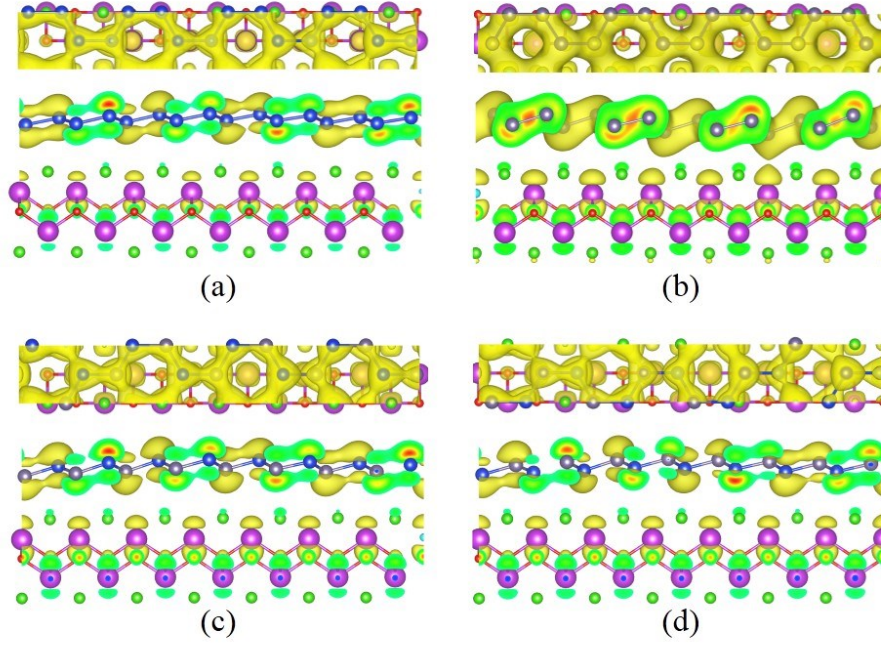

**Fig. S-1** (a)-(d) The partial charge density of B/S, (b) B/G, (c) B/USG and (d) B/DSG between  $\pm 0.3\text{eV}$  at Fermi level, and the isosurface value is  $\pm 0.00032$  electrons per  $\text{\AA}^3$ .

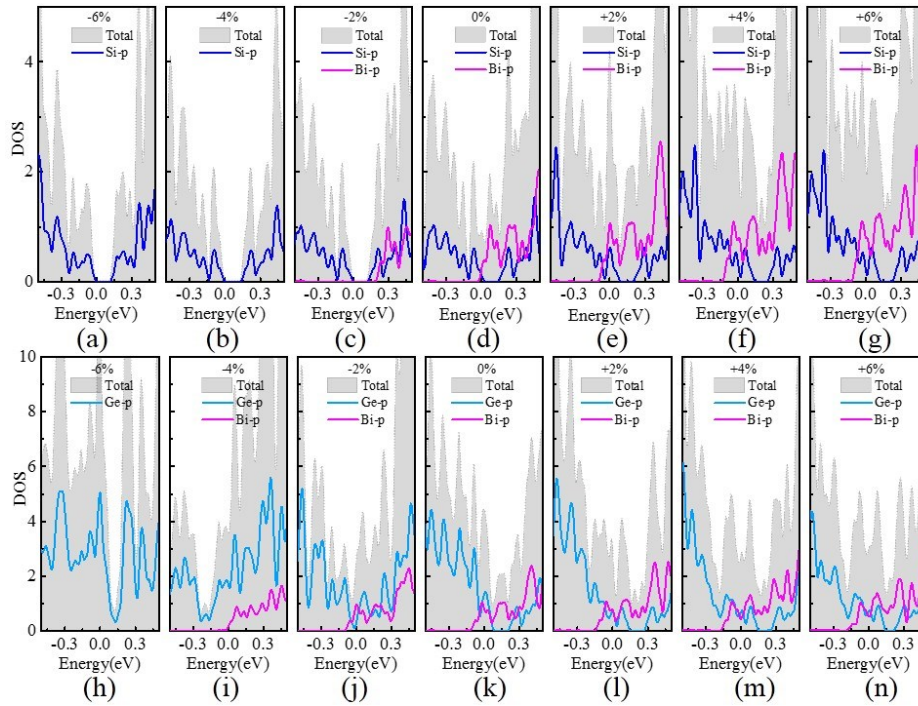

**Fig. S-2** (a)-(g) PDOS diagrams of B/S under biaxial strain. (h)-(n) PDOS diagrams of B/G under biaxial strain.

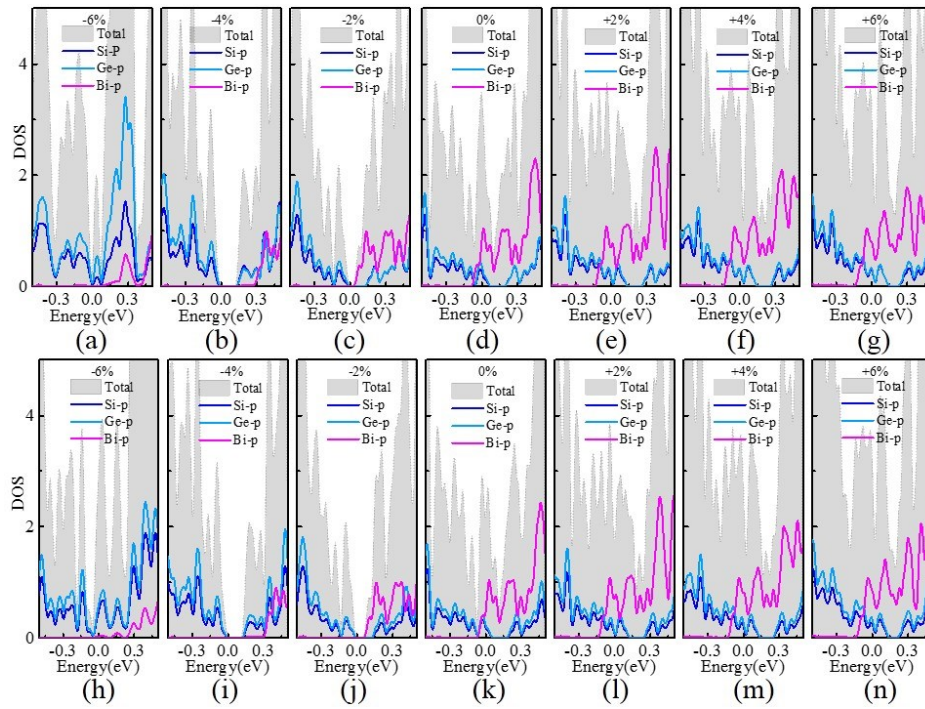

**Fig. S-3** (a)-(g) PDOS diagrams of B/USG under uniaxial strain. (h)-(n) PDOS diagrams of B/DSG under uniaxial strain.

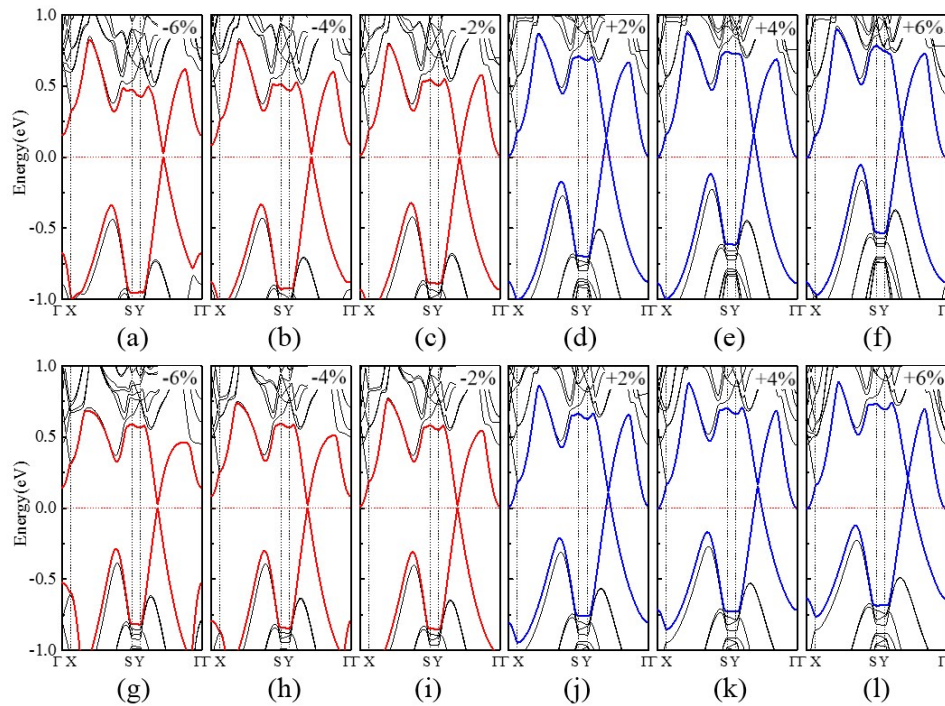

**Fig. S-4** (a)-(f) Band structures of B/S under x-direction uniaxial strain. (g)-(l) Band structures of B/S under y-direction uniaxial strain.

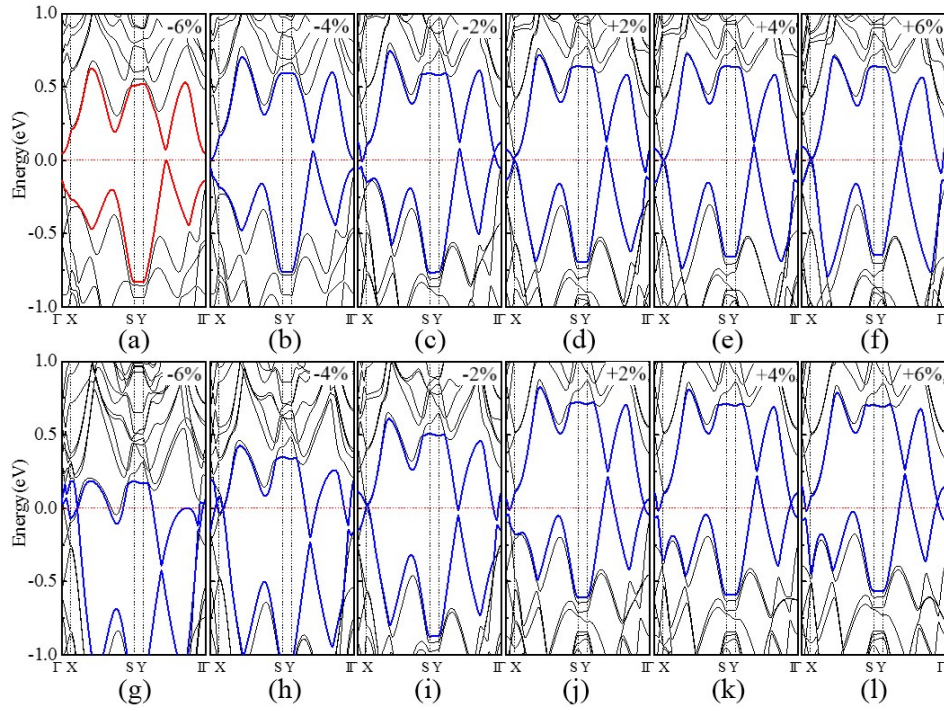

**Fig. S-5** (a)-(f) Band structures of B/G under x-direction uniaxial strain. (g)-(l) Band structures of B/G under y-direction uniaxial strain.

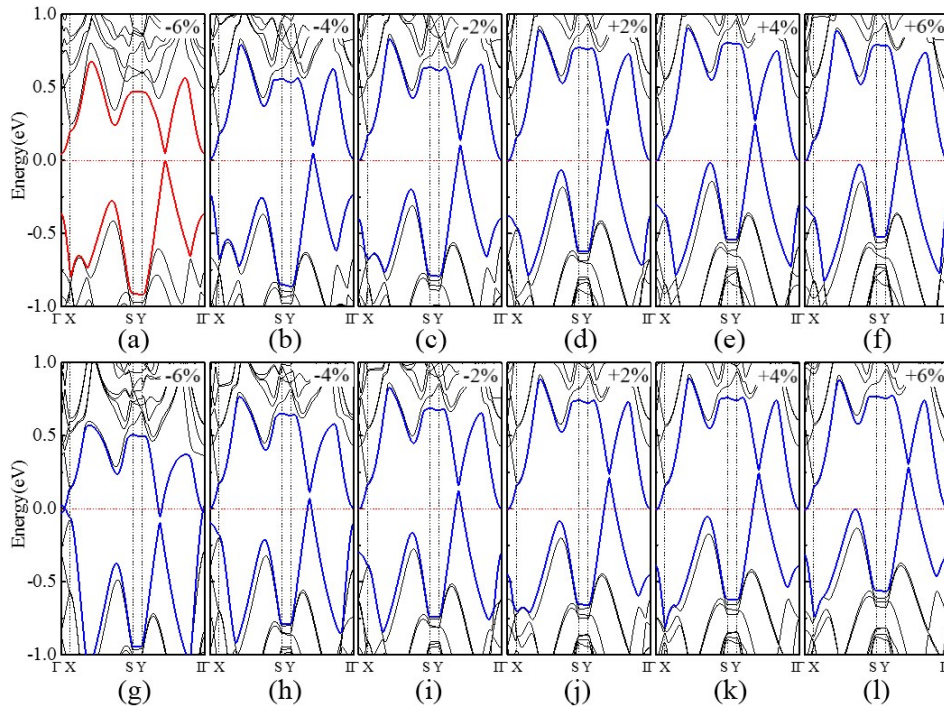

**Fig. S-6** (a)-(f) Band structures of B/USG under x-direction uniaxial strain. (g)-(l) Band structures of B/USG under y-direction uniaxial strain.

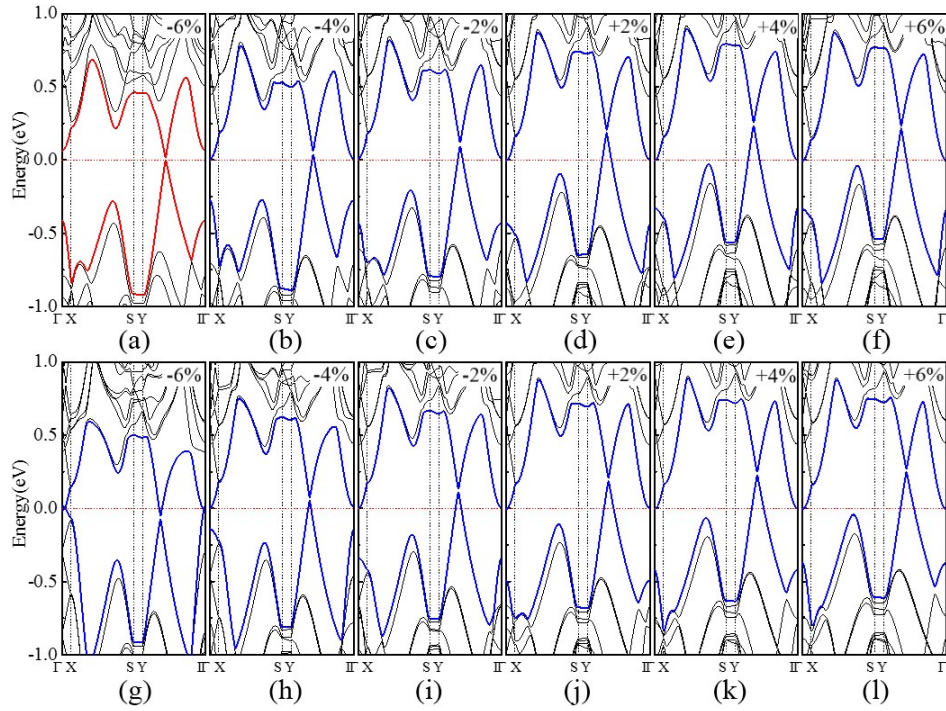

**Fig. S-7** (a)-(f) Band structures of B/DSG under x-direction uniaxial strain. (g)-(l) Band structures of B/DSG under y-direction uniaxial strain.

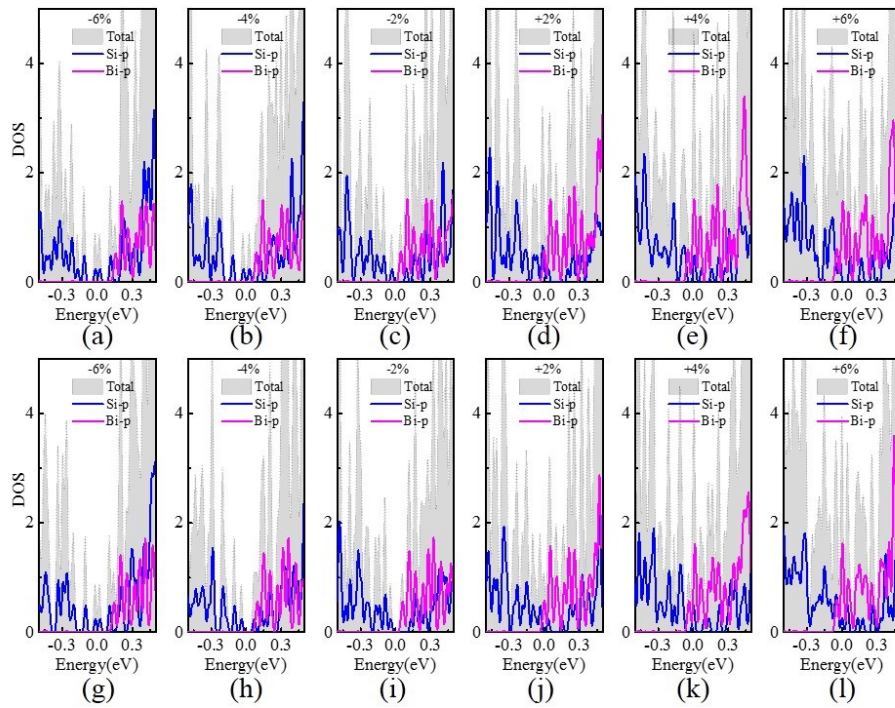

**Fig. S-8** (a)-(f) PDOS diagrams of B/S under x-direction uniaxial strain. (g)-(l) PDOS diagrams of B/S under y-direction uniaxial strain.

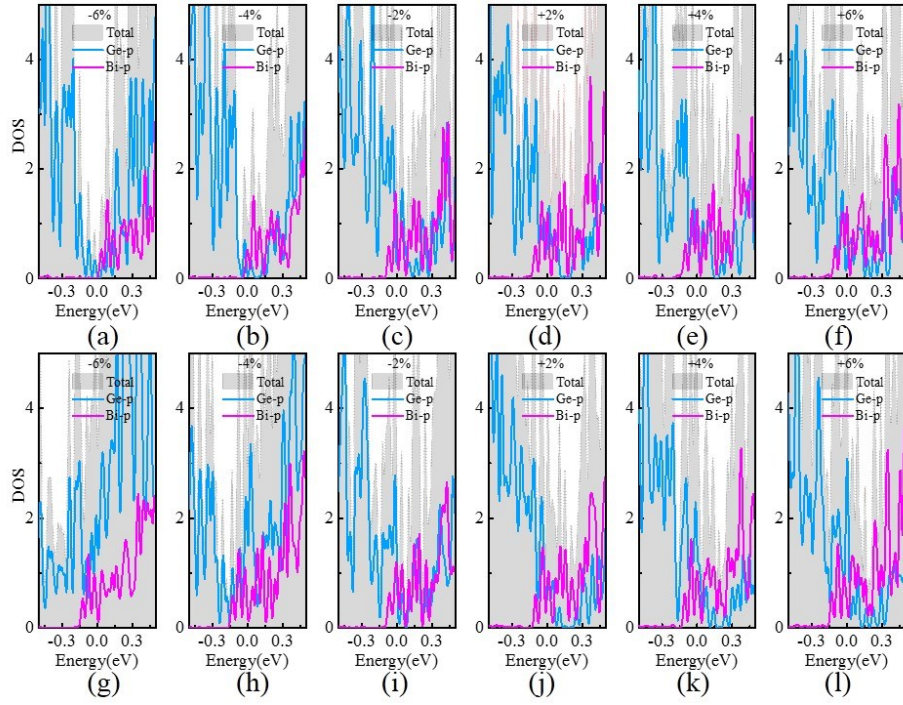

**Fig. S-9** (a)-(f) PDOS diagrams of B/G under x-direction uniaxial strain. (g)-(l) PDOS diagrams of B/G under y-direction uniaxial strain.

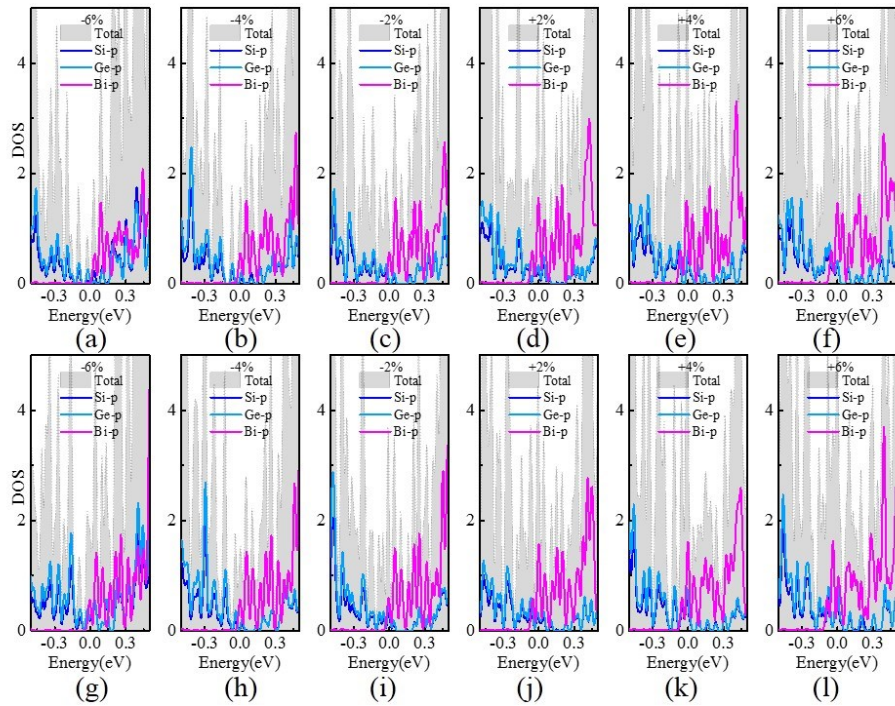

**Fig. S-10** (a)-(f) PDOS diagrams of B/USG under x-direction uniaxial strain. (g)-(l) PDOS diagrams of B/USG under y-direction uniaxial strain.

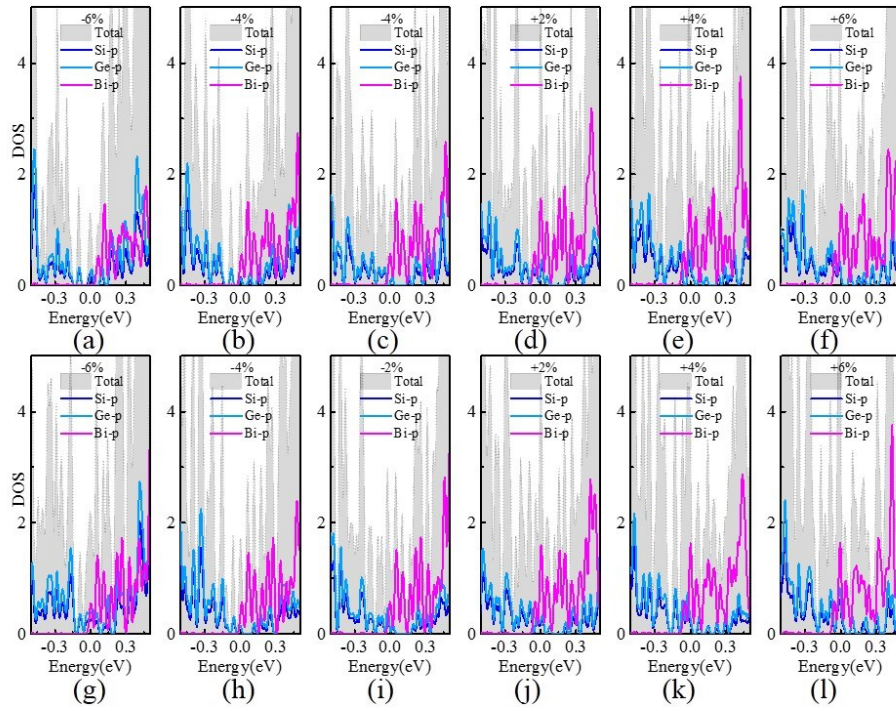

**Fig. S-11** (a)-(f) PDOS diagrams of B/DSG under x-direction uniaxial strain. (g)-(l)

PDOS diagrams of B/DSG under y-direction uniaxial strain.
